# Supplementary material
Source: PubMed Central journal article supplement (PMC5199630)

# Supplementary Figure 1

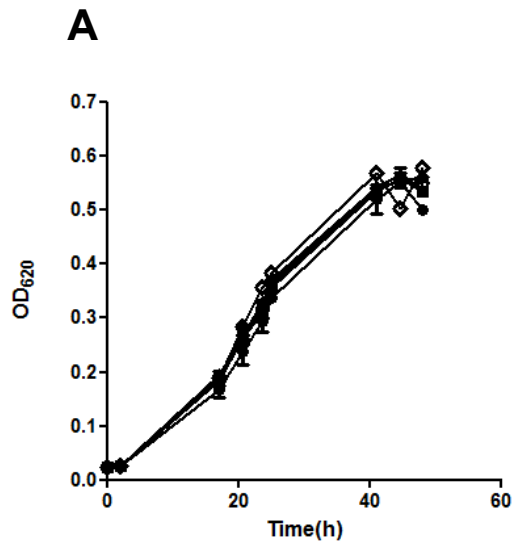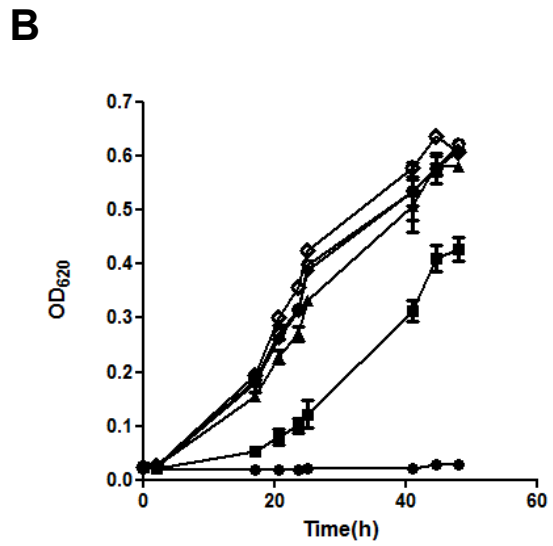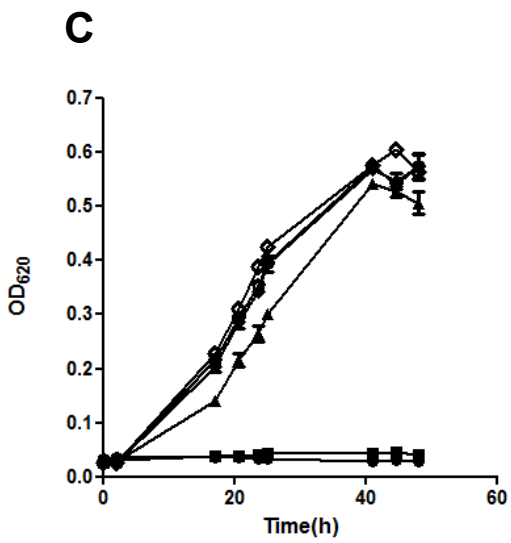

Supplement: NIHMS836815-supplement-01.pdf [file NIHMS836815-supplement-01.pdf]
